# Supplementary material
Source: publisher site journal article supplement (https://www.dovepress.com/article/339331)
Supplement: Supplementary file 1 [file get_supplementary_file.php]

# Appendix 1: Stata Output for Propensity Scores (PSs)

1. The probit regression model used for PSs production

(N=2270, 50 patients are excluded due to missing data)

1. Description of the estimated PSs distribution.

1. Frequencies of PSs in each study group, using the whole population
